# Supplementary material for: Assessing Ecological Risks from Atmospheric Deposition of Nitrogen and Sulfur to US Forests Using Epiphytic Macrolichens
Source: PubMed Central journal article supplement (PMC8549857; doi:10.3390/d11060087), 2019-06-03
Supplement: NIHMS1732714-supplement-Supplement1.pdf [file NIHMS1732714-supplement-Supplement1.pdf]

## Supplementary Materials

**Table S1.** Rare species sensitivity rating means ( $\text{kg ha}^{-1} \text{y}^{-1}$ ) did not differ from common species except for S deposition in the West where rare species means and variances were a little lower (Analysis of Means transformed ranks;  $p \leq 0.05$ ).

| Pollutant | Area | Group  | Group n | Lower Limit | Group Mean | Upper Limit | Limit Exceeded |
|-----------|------|--------|---------|-------------|------------|-------------|----------------|
| N         | East | common | 25      | 0.530       | 0.703      | 1.058       |                |
| N         | East | rare   | 49      | 0.621       | 0.736      | 0.966       |                |
| N         | West | common | 41      | 0.588       | 0.806      | 0.997       |                |
| N         | West | rare   | 101     | 0.682       | 0.739      | 0.903       |                |
| S         | East | common | 26      | 0.547       | 0.868      | 1.047       |                |
| S         | East | rare   | 54      | 0.642       | 0.665      | 0.952       |                |
| S         | West | common | 40      | 0.589       | 0.730      | 0.981       |                |
| S         | West | rare   | 119     | 0.694       | 0.669      | 0.877       | Lower          |

**Table S2.** Rare species sensitivity rating variances ( $\text{kg ha}^{-1} \text{y}^{-1}$ ) did not differ from common species except for S deposition in the West where rare species means and variances were a little lower (Analysis of means for ADM-Leven Variances;  $p \leq 0.05$ ).

| Pollutant | Area | Group  | Group n | Lower Limit | Group Mean ADM | Upper Limit | Limit Exceeded |
|-----------|------|--------|---------|-------------|----------------|-------------|----------------|
| N         | East | common | 25      | 2.287       | 3.113          | 4.459       |                |
| N         | East | rare   | 49      | 2.665       | 3.037          | 4.081       |                |
| N         | West | common | 41      | 2.270       | 2.742          | 3.750       |                |
| N         | West | rare   | 101     | 2.612       | 2.717          | 3.408       |                |
| S         | East | common | 26      | 2.596       | 5.759          | 8.059       |                |
| S         | East | rare   | 54      | 3.632       | 4.359          | 7.023       |                |
| S         | West | common | 40      | 1.203       | 2.803          | 2.671       | Upper          |
| S         | West | rare   | 119     | 1.596       | 1.438          | 2.278       | Lower          |

**Table S3.** Pearson's correlations between predictors and variance inflation factors for Nitrogen models.

|                  | <b>N</b> | <b>Maxaug_c</b> | <b>Mindec_c</b> | <b>Precip_cm</b> | <b>Continent</b> | <b>CMD</b> |
|------------------|----------|-----------------|-----------------|------------------|------------------|------------|
| <b>N</b>         | 1        | 0.48            | 0.15            | -0.15            | 0.25             | -0.1       |
| <b>maxaug_c</b>  | 0.48     | 1               | 0.32            | -0.54            | 0.52             | 0.53       |
| <b>mindec_c</b>  | 0.15     | 0.32            | 1               | 0.36             | -0.64            | 0.12       |
| <b>precip_cm</b> | -0.15    | -0.54           | 0.36            | 1                | -0.76            | -0.5       |
| <b>continent</b> | 0.25     | 0.52            | -0.64           | -0.76            | 1                | 0.32       |
| <b>CMD</b>       | -0.1     | 0.53            | 0.12            | -0.5             | 0.32             | 1          |
| <b>VIF</b>       | NA       | 2.53            | 2.1             | 2.92             | -- <sup>1</sup>  | 1.6        |

<sup>1</sup> continentality is calculated using Aug and Dec temperature and therefore is perfectly correlated.

**Table S4.** Pearson's correlations between predictors and variance inflation factors for Sulfur models.

|                  | <b>S</b> | <b>Maxaug_c</b> | <b>Mindec_c</b> | <b>Precip_cm</b> | <b>Continen</b> | <b>CMD</b> |
|------------------|----------|-----------------|-----------------|------------------|-----------------|------------|
| <b>S</b>         | 1        | 0.31            | 0.07            | -0.08            | 0.18            | -0.2       |
| <b>maxaug_c</b>  | 0.31     | 1               | 0.29            | -0.53            | 0.51            | 0.54       |
| <b>mindec_c</b>  | 0.07     | 0.29            | 1               | 0.39             | -0.67           | 0.1        |
| <b>precip_cm</b> | -0.08    | -0.53           | 0.39            | 1                | -0.76           | -0.5       |
| <b>continen</b>  | 0.18     | 0.51            | -0.67           | -0.76            | 1               | 0.32       |
| <b>CMD</b>       | -0.2     | 0.54            | 0.1             | -0.5             | 0.32            | 1          |
| <b>VIF</b>       | NA       | 2.43            | 2.07            | 2.88             | -- <sup>1</sup> | 1.6        |

<sup>1</sup> continentality is calculated using Aug and Dec temperature and therefore is perfectly correlated.
